# Supplementary material
Source: Research Square preprint supplement (doi:10.21203/rs.3.rs-10143847/v1)
Supplement: Supplementary file 1 [file 5f6ab7e1c938b782290a2daf.docx]

Table 1: Socio-demographic of participants in Dire Dawa Administration, Eastern Ethiopia, 2024 (n= 578).

| Variable | Category | Frequency | Percent |
| --- | --- | --- | --- |
| Age (years) | < 30 | 166 | 28.72 |
| 30-40 | 336 | 58.13 |
| >40 | 76 | 13.15 |
| Sex | Female | 344 | 59.52 |
| Male | 234 | 40.48 |
| Marital status | Married | 371 | 64.2 |
| Single | 207 | 35.8 |
| Educational level | Diploma | 139 | 24.05 |
| BSc Degree | 428 | 74.05 |
| Masters & above | 11 | 1.90 |
| Profession | Nurse | 258 | 44.64 |
| Laboratory | 35 | 6.06 |
| Midwife | 98 | 16.96 |
| Pharmacist | 53 | 9.17 |
| Physician | 79 | 13.67 |
| Other* | 55 | 9.52 |
| Monthly salary (USD) | <87.22 | 26 | 4.50 |
| 87.22-174.44 | 474 | 82.01 |
| >174.44 | 78 | 13.49 |
| Work experience (years) | ≤5 | 156 | 27.0 |
|  | >5 | 422 | 73.0 |

*Others: Health officers, radiology technologists, anaesthetists, professionals, and physiotherapists

Table 2: Behavioural and psychosocial factors of healthcare workers in Dire Dawa Administration, Eastern Ethiopia, 2024. (n= 578)

| Variables | Category | Frequent | Percent |
| --- | --- | --- | --- |
| BMI | Underweight | 29 | 5.02 |
| Normal | 343 | 59.34 |
| Overweight | 189 | 32.70 |
| Obese | 17 | 2.94 |
| Alcohol drinking | Yes | 186 | 32.18 |
| No | 392 | 67.82 |
| Job satisfaction | Satisfied | 283 | 48.96 |
| Unsatisfied | 295 | 51.04 |
| Job stress | Yes | 284 | 49.13 |
| No | 294 | 50.87 |

Table 3: Work-related factors of healthcare workers in Dire Dawa Administration, Eastern Ethiopia, 2024 (n= 578).

| Variables | Category | Frequency | Percent (%) |
| --- | --- | --- | --- |
| Standing Long-time | Yes | 249 | 43.08 |
| No | 329 | 56.92 |
| Lifting heavy things | Yes | 199 | 34.43 |
| No | 379 | 65.57 |
| Frequent Bending | Yes | 244 | 42.21 |
| No | 334 | 57.79 |
| Awkward position | Yes | 247 | 42.73 |
| No | 331 | 57.27 |
| Pushing patients | Yes | 95 | 16.44 |
| No | 483 | 83.56 |
| Work shift | Day only | 90 | 15.57 |
| Day and Night | 488 | 84.43 |
| Working hrs. per day | <8 hours | 191 | 33.04 |
| >=8 hours | 378 | 66.96 |
| Safety training | No | 290 | 50.17 |
| Yes | 288 | 49.83 |
| Break at work | No | 261 | 45.16 |
| Yes | 317 | 54.84 |
| Sleep disturbance | No to Mild disturbance | 265 | 45.85 |
| Moderate disturbance | 259 | 44.81 |
| Severe disturbance | 54 | 9.34 |

Table 4: Factors associated with low back pain in the past 12 months among healthcare workers in Dire Dawa Administration, Eastern Ethiopia, 2024 (n=578).

| Variables | Category | Low back pain | | COR (95% CI) | AOR (95% CI) | p-value |
| --- | --- | --- | --- | --- | --- | --- |
| No (%) | Yes (%) |
| Age | < 30 | 137 | 29 | 1 | 1 |  |
| 30-40 | 242 | 94 | 1.83(1.15-2.29) | 0.81(0.41.1.59) | 0.552 |
| >40 | 26 | 50 | 9.08 (4.88-16.89) | 2.92(1.26-6.74) | 0.012* |
| Sex | Male | 175 | 59 | 1 | 1 |  |
| Female | 230 | 114 | 1.47 (1.01- 2.13) | 1.42(0.89-2.26) | 0.133 |
| Work experience | ≤5 | 137 | 19 | 1 | 1 |  |
| >5 | 268 | 154 | 4.14(2.46-6.96) | 3.27(1.54-6.93) | 0.002* |
| Long standing | No | 268 | 61 | 1 | 1 |  |
| Yes | 137 | 112 | 3.59 (2.47-5.22) | 2.05(1.26-3.36) | 0.004* |
| Lifting heavy things | No | 310 | 69 | 1 | 1 |  |
| Yes | 95 | 104 | 4.91 (3.35- 7.20) | 4.30(2.38-7.75) | 0.000* |
| Frequent Bending | No | 272 | 62 | 1 | 1 |  |
| Yes | 133 | 111 | 3.66 (2.51- 5.31) | 1.17(0.67-2.07) | 0.566 |
| Alcohol drinking | No | 295 | 97 | 1 | 1 |  |
| Yes | 110 | 76 | 2.10(1.45-3.04) | 2.75(1.68-4.50) | 0.000* |
| Break at work | No | 164 | 97 | 1.87 (1.30-2.68) | 2.50(1.49-4.20) | 0.001* |
| Yes | 241 | 76 | 1 | 1 |  |
| Job satisfaction | Unsatisfied | 193 | 102 | 1.57(1.10-2.26) | 1.12(0.68-1.85) | 0.638 |
| Satisfied | 212 | 71 | 1 | 1 |  |

Abbreviation: **AOR**, Adjusted Odds Ratio; **COR**, Crude Odds Ratio; **CI,** Confidence Interval.
